# Supplementary material
Source: PubMed Central journal article supplement (PMC2996027)
Supplement: pp.110.165969_1.pdf [file pp.110.165969_1.pdf]

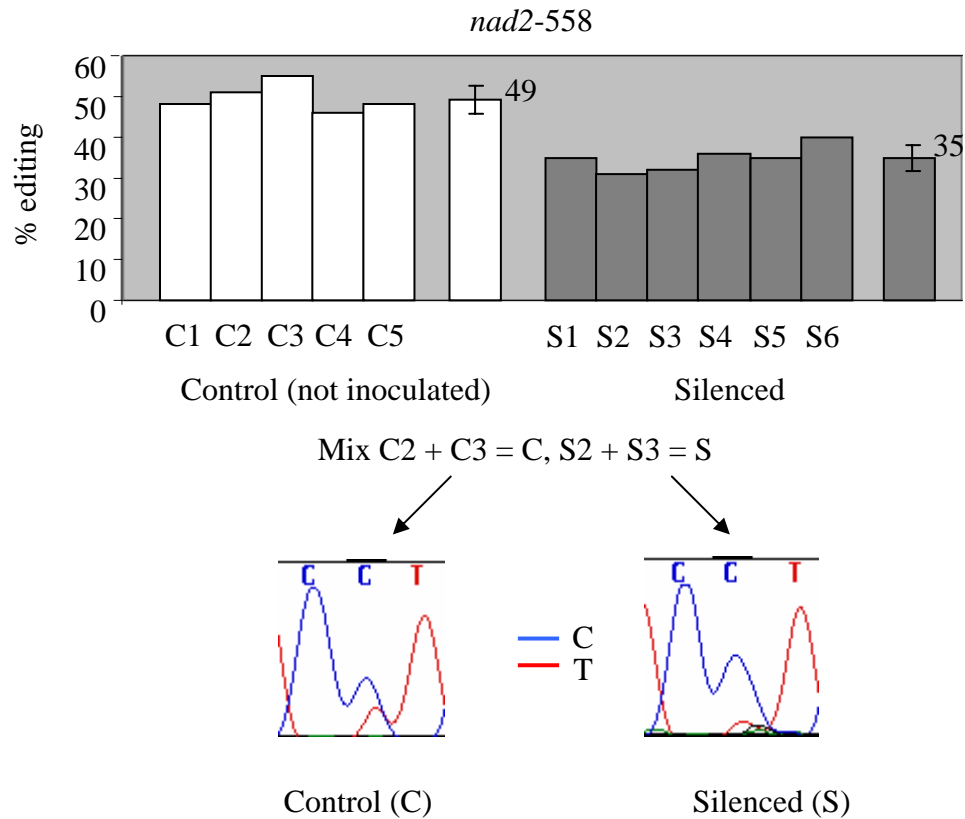

**Supplemental Figure 1.** RNA from pooled samples can be used to detect editing differences between control and silenced plants. Comparison of the sequencing electropherograms of *nad2* RT-PCR products obtained from control and silenced pools shows a noticeable difference in the height of the T peak at position 558. The difference in the T peaks reflects the differential editing extent of *nad2-558* between control and silenced pools.

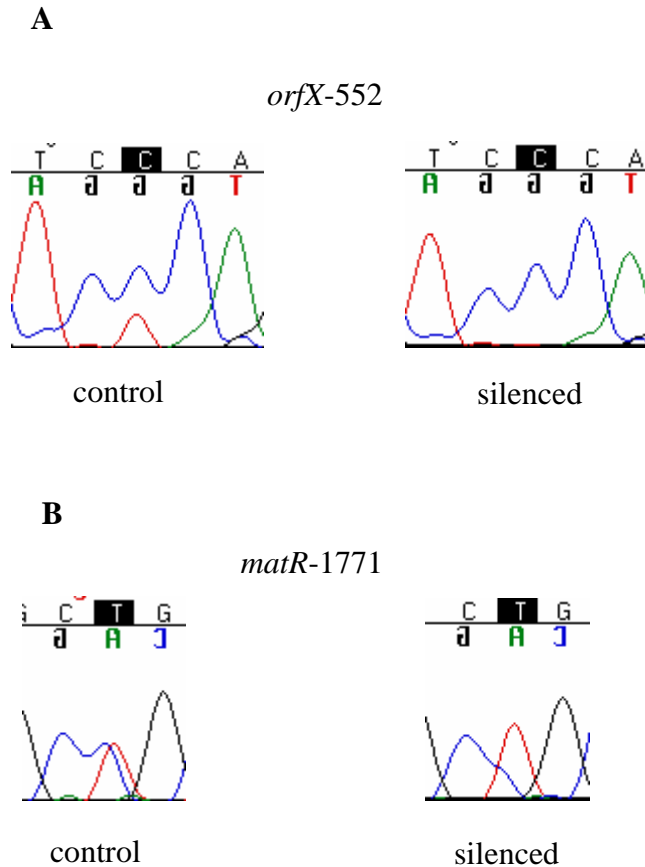

**Supplemental Figure 2.** An example of differential editing between pools of control and silenced plants assessed by electrophoretogram traces of bulk RT-PCR products. Editing T is shown in red. A, *OrfX-552* is more edited in control than in silenced pools. B, *MatR-1771* is less edited in control than in silenced pools. Note that the height of the peaks does not reflect the actual editing extent as evaluated by PPE (43% vs. 26% and 60% vs. 76% for *orfX-552* and *matR-1771* respectively).

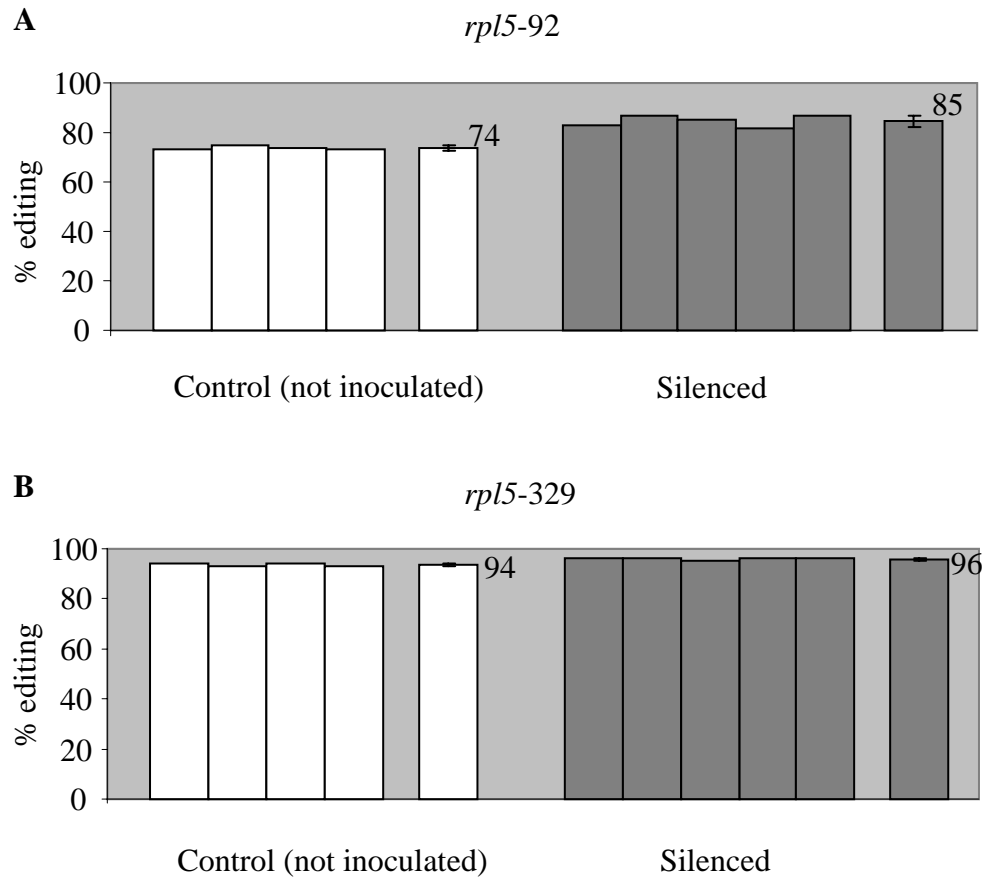

**Supplemental Figure 3.** Virus induced gene silencing (VIGS) of *REME1* results in increased editing of sites found in *rpl5*. A, Editing extent of C at position 92 is increased by an average of 15% in silenced plants ( $(85-74)/74 = 0.15$ ,  $P < 5 \cdot 10^{-5}$ ). B, The increase in editing is much less pronounced for the edited C at position 329 ( $P < 3 \cdot 10^{-4}$ ). On the right of each group is the average editing extent with s.d.

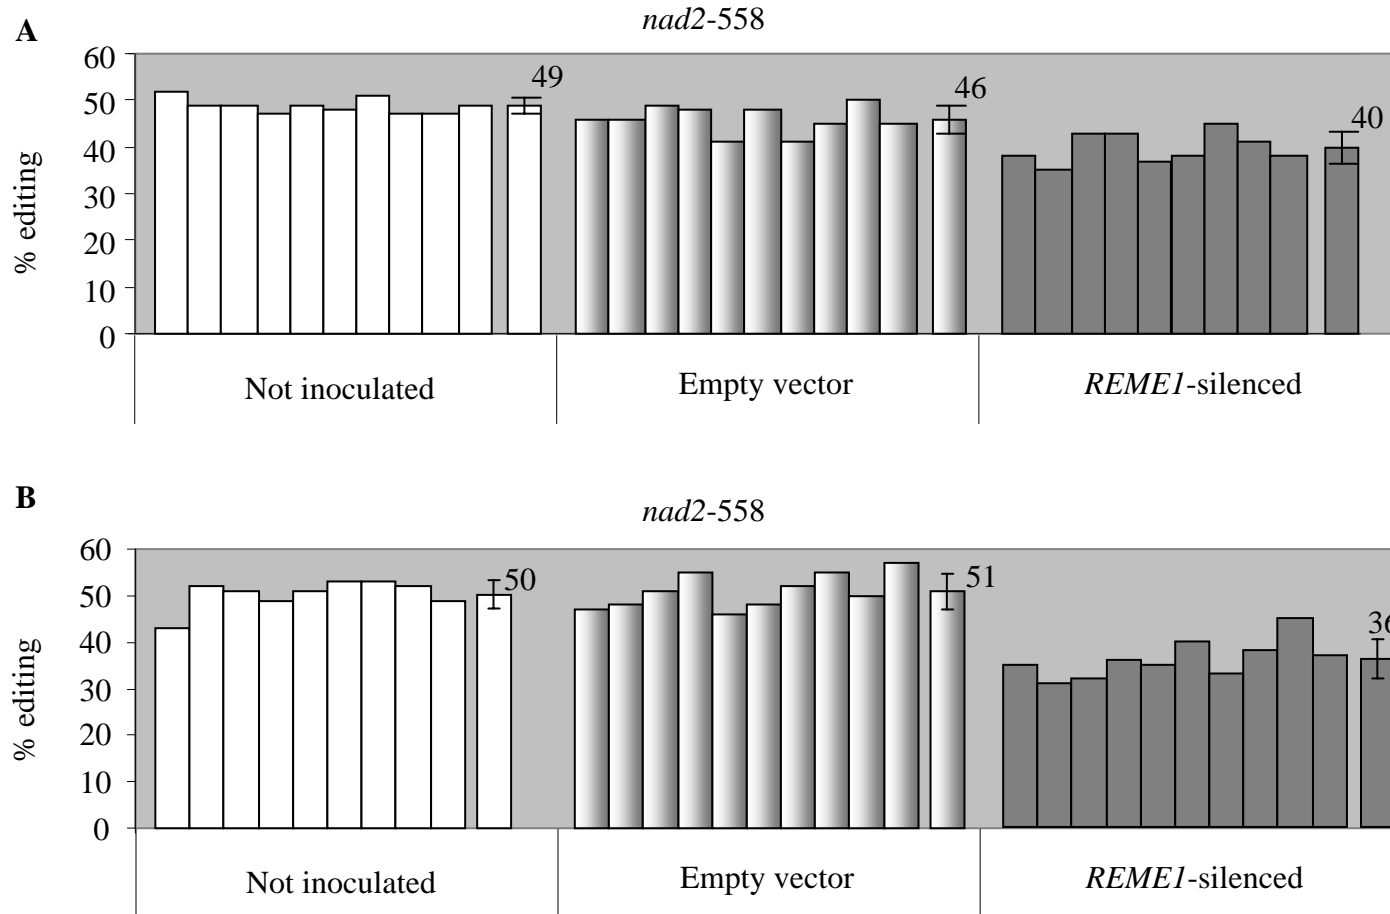

**Supplemental Figure 4.** Editing extent of *nad2-558* is decreased in *REME1* silenced plants. Editing extents were assayed by PPE. A and B show data from two independent experiments. A, Virus inoculation induces a significant decrease of *nad2-558* editing extent (not inoculated vs. empty vector,  $P < 2 \cdot 10^{-2}$ ), but half the range of *REME1* specific silencing (empty vector vs. *REME1*-silenced,  $P < 7 \cdot 10^{-4}$ ). B, No effect of virus inoculation on *nad2-558* editing extent was detectable (not inoculated vs. empty vector,  $P = 0.7$ ). The decrease in *nad2-558* editing extent in *REME1* silenced plants is more pronounced in B than in A (29% =  $(50-36)/36 \times 100$  vs. 18%  $(49-40)/49 \times 100$ ). On the right of each group is the average editing extent with s.d.

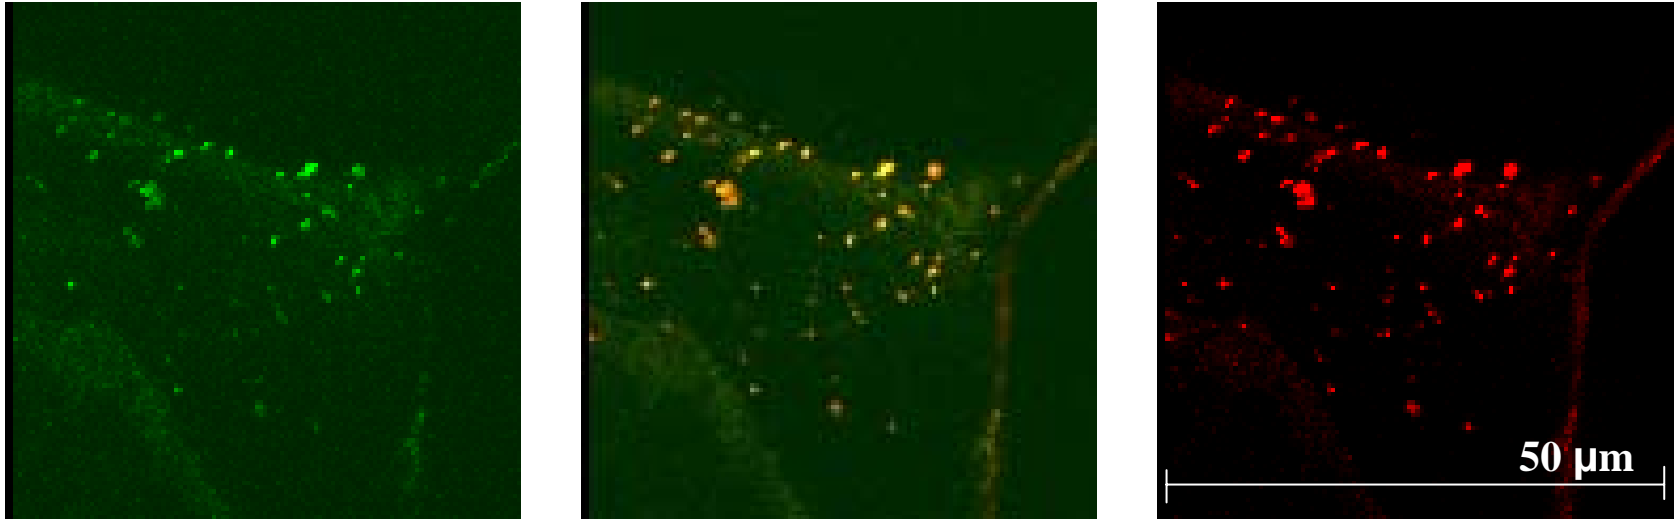

**Supplemental Figure 5.** REME1 is targeted to mitochondria. In the panels are shown the subcellular localization in onion epidermal cells of REME1 fused to GFP (left panel) and of the Cherry fluorescent marker addressed to mitochondria (right panel). In the middle panel is shown an overlay of the two pictures showing a clear co-localization of both fluorescent markers.

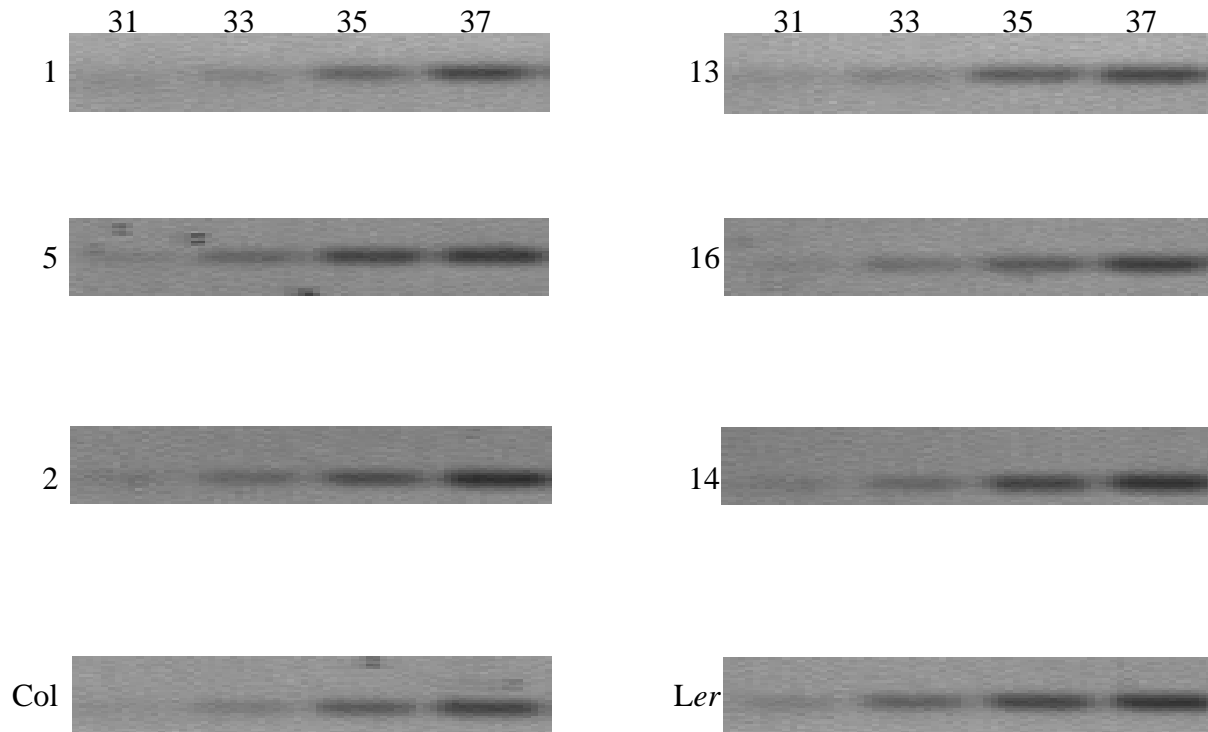

**Supplemental Figure 6.** Semi-quantitative RT-PCR of a reference gene (*At4g26410*) shows no difference in expression level between transgenic lines and parental accessions. RT-PCR products were amplified and electrophoresed on 1% agarose gels after a completed number of cycles indicated above each lane. On the left of each gel are indicated the origin of the RNA used for the RT-PCR: 1, 13, 5, 16, 2, and 14 are  $T_0$  *Ler* plants expressing *REME1* Col allele and showing a high, low, and medium level of *nad2-558* editing extent respectively. The same amount of template RNA (50 ng) was used for each reverse transcription reaction. The abundance of RT-PCR products is very similar for each template. This control experiment validates the difference observed in *REME1* expression level reported in Figure 10.

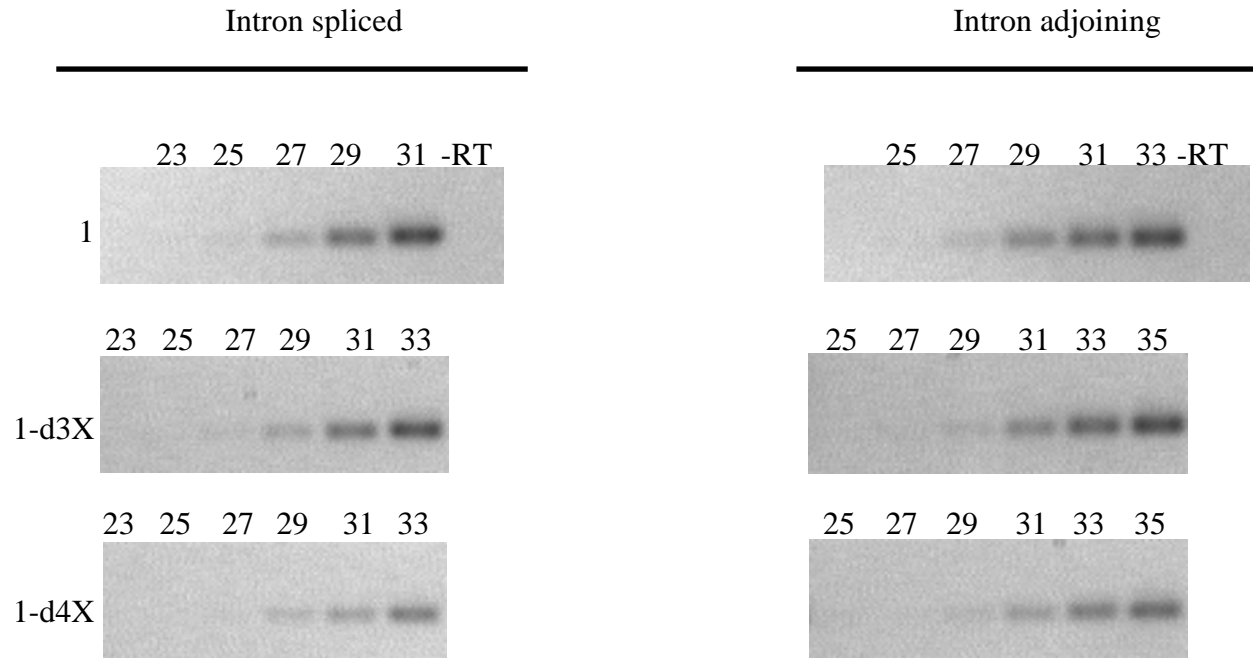

**Supplemental Figure 7.** Semi-quantitative RT-PCR is able to detect a three to four-fold reduction in *nad2* second intron spliced or intron adjoining product. Intron-spliced and intron-adjoining RT-PCR products for the second intron were amplified and electrophoresed on 2% agarose gels after a completed number of cycles indicated above each lane. –RT indicates a negative control in which the reverse transcriptase was omitted and was performed for each combination of primers at the maximum number of cycles (e.g. 31 for intron2-spliced). On the left of each gel are indicated the origin of the RNA used for the RT-PCR: 1 is a  $T_0$  *Ler* plant expressing *REME1* Col allele, 1-d3X and 1-d4X indicate a three and four times dilution of the cDNA from 1. The difference between 1 and 1-d3X is readily observable as there is a shift of about 2 cycles to obtain the same amount of PCR product (e.g., intron-spliced amplification, 27 cycles for 1 vs. 29 cycles for 1-d3X). The difference in PCR products abundance is even more pronounced between 1 and 1-d4X.

**Supplemental Table 1.** Markers used in *REME1* fine mapping

| Marker <sup>a</sup> | Category   | Primers <sup>b</sup>                                                                                                                                                                                            | Amplicon length | Enzyme | Allele cut | Polymorphism coordinates (AGI map) <sup>c</sup> |
|---------------------|------------|-----------------------------------------------------------------------------------------------------------------------------------------------------------------------------------------------------------------|-----------------|--------|------------|-------------------------------------------------|
| 1027K               | CAPs       | 1027K-F1 = CCTTGATATAAACTTGACGATTGT<br>1027K-R1 = ACGAACCGACAATATTATGTATGT                                                                                                                                      | 556 bp          | RsaI   | <i>Ler</i> | 1027083                                         |
| 1113K               | CAPs       | 1113K-F1 = AAAGATCGGTAGACAAATCATTGA<br>1113K-F1 = ATTCGCCGAGTTATTTGTAATAAAA                                                                                                                                     | 381 bp          | MfeI   | <i>Ler</i> | 1112836                                         |
| 1135K               | CAPs       | 1135K-F1 = ACTCTAGTGAGCCCAAAGATGAC<br>1135K-R1 = AGACCGGATGTGTTACCATCTG                                                                                                                                         | 406 bp          | TscI   | Col        | 1134935                                         |
| 1150K               | sequencing | 1150K-F1 = GCGGCTTGCATACCAGTA<br>1150K-R1 = CGTCACTAATCCTAAATCAGGTAC                                                                                                                                            | 442 bp          |        |            | 11 SNPs<br>1149913-1150153                      |
| 1170K               | sequencing | 1170K-F1 = CTATTAAGCTATTTCAAGGGAAAAA<br>1170K-R1 = TCGATCGGTTATACTATGTTTAATC                                                                                                                                    | 416 bp          |        |            | 1170362                                         |
| 1181K               | CAPs       | 1181K-F1 = AGACGCCTTGGTTTGATTGT<br>1181K-R1 = ATTCGATTTTTCCGGTTTACTTC                                                                                                                                           | 471 bp          | PstI   | Col        | 1181241                                         |
| At2g03880           | sequencing | At2g03880-F1 = ACCGGAAAAATCGAATGTCTGAGT<br>At2g03880-5' = TGGATTCATTGCAAAGTCATGG<br>At2g03880-F2 = TGGTGGGTTTGCTCAGAATAGTA<br>At2g03880-F3 = CGGAGTATGCAGCTAAAAAGGTC<br>At2g03880-R1 = GTGCAGCAAGTGTCTTCCCATTAA | 2316 bp         |        |            | 51 SNPs, 3 indels<br>1181511-1183701            |
| 1184K,1186K         | sequencing | 1184K-F1 = TCATGTCATCGCTACATCCTATTA<br>1184K-F2 = TTCCACTGCAAAGGTATTAAATA<br>1186K-R1 = CATCCCCAAAACACAACCAGT                                                                                                   | 1917 bp         |        |            | 4 SNPs, 3 indels<br>1184613-1185817             |
| 1193K               | CAPs       | 1193K-F1 = AAATCGATCTCTAGCTTCAACTAA<br>11931K-R1 = CTATCTTAGTGCGAGCATGATC                                                                                                                                       | 398 bp          | EarI   | <i>Ler</i> | 1192628                                         |
| 1220K               | CAPs       | 1220K-F1 = AATGTTTCCCAATTAATAGTATAGATG<br>1220K-R1 = AAGCGACAATATAATAAAAATTAGTTTT                                                                                                                               | 402 bp          | EcoRV  | <i>Ler</i> | 1220166                                         |
| 1276K               | CAPs       | 1276K-F1 = GCATAAGTTAGGAGCAAGAAAGTT<br>1276K-R1 = GACGCGGATCAAAGAAAATA                                                                                                                                          | 381 bp          | ClaI   | Col        | 1275626                                         |

<sup>a</sup>Markers 1027K and 1276K were used to screen the 692 F2 plants. Recombinants were then genotyped with the other markers.

<sup>b</sup>For sequencing markers the internal markers used for sequencing are also given, the amplification were obtained with the pair marker-F1, marker-R1.

<sup>c</sup>Physical coordinates of the polymorphism are given in bp; when several SNPs correspond to a marker, the number is given and the coordinates of the first and the last SNP are also provided.



**Supplemental Table 2.** New primers used in mitochondrial genes screening

| Gene             | Primers <sup>a</sup>                                                                                                                                              | Amplicon length |
|------------------|-------------------------------------------------------------------------------------------------------------------------------------------------------------------|-----------------|
| Coding sequences |                                                                                                                                                                   |                 |
| <i>atp1</i>      | atp1-F1 = CGCGGAATTAGACCTGCTATTAAC<br>atp1-R1 = TGATTGAGGATTCCTAATGTGATG                                                                                          | 469 bp          |
| <i>ccb206</i>    | ccb206-F1 = CAGCCTTGAAGTGAATGAATT<br>ccb206-R1* = TTAATCTTGTAATACTAATCGAGACC                                                                                      | 661 bp          |
| <i>ccb382</i>    | <b>ccb382-R2 = GATTAGACCATGTTCCCTGAGATTT</b>                                                                                                                      |                 |
| <i>ccb452</i>    | <b>ccb452-F2 = GAATCACTTCATGCCGACCTC</b><br><b>ccb452-R2 = AAGTGTTTGGCCTTTCCTTCT</b>                                                                              |                 |
| <i>cox2</i>      | cox2-F1 = ATGATTGTTCTAAAATGGTTATT<br>cox2-R1* = GTTTGGGGGATTAATTGATTGG<br><b>cox2-R2 = TCAGAATACTCATAAGTCCGATACC</b>                                              | 770 bp          |
| <i>matR</i>      | matR-F1 = AGAGGCGATCAGAATGGTACTCGA<br>matR-R1 = GTCTTGACCGGGTCCGAGCTTCC                                                                                           | 1927 bp         |
| <i>nad1</i>      | nad1-F1 = AGGCCAGATCATGAGTAAATAAAA<br>nad1-R1* = AAAGGTGACTAAAAGACCAGAAAC                                                                                         | 995 bp          |
| <i>nad2</i>      | nad2-F1 = GACCGTAAACGTAAGTGACTCAGTG<br>nad2-R1 = ACGGCCTACCCTTTCTTTGAA<br><b>nad2-F2 = TTGATGCTTTTGAATTCATTGTAT</b><br><b>nad2-F3 = GGCAAACCCGTGTCAAAT</b>        | 1578 bp         |
| <i>nad3</i>      | nad3-F1 = AGCAAGGAGCGAGAAAACAAAGT<br>nad3-R1 = CCCCCATTTTGTGCCCTATC                                                                                               | 414 bp          |
| <i>nad4</i>      | nad4-F1 = ATGTTAGAACATTTCTGTGAATGCTATT<br>nad4-R1* = TTTGCCATGTTGCACTAAGTTACT<br><b>nad4-R2 = CACGCTTTCGGGAAAAACA</b>                                             | 1479 bp         |
| <i>nad5</i>      | nad5-F1 = TTTTTCGGACGTTTTCTAGGA<br>nad5-R1 = TAAAACTACTCACTATCAAAATGAAAG<br><b>nad5-F2 = GGTGATTTTGGATTAGCTCTTG</b><br><b>nad5-F3 = GAAGTCTCATTTCGAAGCTTTAGAC</b> | 1937 bp         |
| <i>nad6</i>      | nad6-F1 = ATGATACTTTCTGTTTTGTGTCGAG<br>nad6-R1 = CTTTTCACCTTAGTAGTCCTATGC                                                                                         | 536 bp          |
| <i>nad7</i>      | nad7-F1 = ATGACGACTAGGAAAAGGCAAAT<br>nad7-R1* = ATCCACCTCTCCAACACAATA<br><b>nad7-R2 = TTCTCCCGCTCCTCAAAA</b><br><b>nad7-F2 = AAAGGATTGGGGATTCAGTG</b>             | 1179 bp         |
| <i>orf114</i>    | orf114-F1* = CAACCGGCGATTGGATG<br>orf114-R1 = AATGGAAAAGGAACACCGAGTAG                                                                                             | 381 bp          |
| <i>rps3</i>      | <b>rps3-F2 = CGCCCCTCCTTGAATTTT</b><br><b>rps3-F3 = GGGTGGAGGGAATCCGTATA</b>                                                                                      |                 |

|                         |                                                                                                                                  |        |
|-------------------------|----------------------------------------------------------------------------------------------------------------------------------|--------|
| <i>rps4</i>             | <b>rps3-R2 = AGAATAATACACCTACCGAGACGA</b><br><b>rps4-F2 = AAGTTTGGATCCGAAAAAGTATG</b><br><b>rps4-R2 = CACAAACCCTTCGATGACTTAT</b> |        |
| UTR and introns         |                                                                                                                                  |        |
| <i>cox3</i> -trailer    | <i>cox3</i> -tr-F1 = TTCGGCAATATCTTGGTCATCTG<br><i>cox3</i> -tr-R1 = TTCGGGTCATTTCTTGGTGAAC                                      | 341 bp |
| <i>nad5</i> -intron     | <i>nad5</i> -intr-F1 = GTGGGGCAGAGGGCTCGTAGTACC<br><i>nad5</i> -intr-R1 = CGGTCGGGCTATCGAACACAGAGT                               | 406 bp |
| <i>nad6</i> - leader    | <i>nad6</i> -ld-F1 = AAGGGCTTGAAGAAGAAAATG<br><i>nad6</i> -ld-R1 = ATAGCGCAATACTTCTTCGTGAAT                                      | 375 bp |
| <i>nad7</i> - leader    | <i>nad7</i> -ld-F1: GGAGATGCATTTCTGGTACAAGTG<br><i>nad7</i> -ld-R1: GTTCCGCACGTTCCACCAC                                          | 203 bp |
| <i>nad7</i> -2nd-intron | <i>nad7</i> -2ndintr-F1 = CTCCGCCCGGTGACTAAGAAAG<br><i>nad7</i> -2ndintr-R1 = AGCGTGTTCTTGGGCCATCATAG                            | 343 bp |
| <i>rpl5</i> -trailer    | <i>rpl5</i> -tr-F1 = TATTCGGGGGTTCAATGTGACTATTA<br><i>rpl5</i> -tr-R1 = TTCGAAAGAACTCAGATACAGAACGA                               | 338 bp |
| <i>rpl16</i> -trailer   | <i>rpl16</i> -tr-F1= ATTAGCGGCTCATAAACCATGTTC<br><i>rpl16</i> -tr-R1= CCATACATATCGAGGGCTTTATCA                                   | 469 bp |
| <i>rps7</i> -leader     | <i>rps7</i> -ld-F1 = ACAAACTCGACTAAAAGAAGAGGT<br><i>rps7</i> -ld-R1 = CGTCAACCATAAGTTTGATTACAT                                   | 410 bp |

<sup>a</sup>Primers in bold are internal primers used for bulk-sequencing the RT-PCR products.  
Primers with \* have already been reported (Bentolila et al., 2008)

**Supplemental Table 3.** New PPE primers used in this report

| Gene                 | Position of differentially edited site <sup>a</sup> | PPE primers <sup>b</sup>                                                                                                                                                |
|----------------------|-----------------------------------------------------|-------------------------------------------------------------------------------------------------------------------------------------------------------------------------|
| Coding sequences     |                                                     |                                                                                                                                                                         |
| <i>ccb206</i>        | 80                                                  | ccb206-80 = CACCAATCACGAGTTTTTCTTTATTCTC                                                                                                                                |
| <i>ccb256</i>        | 184<br>421                                          | ccb256-184R = GCCGTGGCGATATAACAATAATACTCATC<br>ccb256-421 = CATCTTGTTTTTTATTACCTGGGTGCAC                                                                                |
| <i>ccb382</i>        | 709                                                 | ccb382-709 = GCTCTTGGCATTGCTTTGTTTTCTC                                                                                                                                  |
| <i>ccb452</i>        | 1246<br>1280                                        | ccb452-1246 = ATAATGAAACTGCCTTTTATTTTTTTTAT<br>ccb452-1280 = ATTTATGTTGGCTTCGTTGGGAGGC                                                                                  |
| <i>matR</i>          | 374<br>461<br>1771<br>1807                          | matR-374R = GATCGAGCTTGTGTAGGTAGATGTTGCC<br>matR-461 = CGAAATTCCGATTGTTTCAGAGAGTCAG<br>matR-1771R = CGTTCGGACTTGATAAAGGTTGTCG<br>matR-1807R = GAATATTGCAGACCAGCGAATCTGG |
| <i>orf114</i>        | 327                                                 | orf114-327 = GGATCAAAGAACTAGCAGACTAATCACTAAATAG                                                                                                                         |
| <i>orfX</i>          | 552                                                 | orfX-552 = CGTATTTTGTTTCATTCATCGGTATGCTC                                                                                                                                |
| <i>rpl5</i>          | 92<br>329                                           | rpl5-92R = GGGTGCCTTTGGTACTACTCTTATTTTAC<br>rpl5-329R = CGACCGGAAAATCTAATAGAGACATTACTG                                                                                  |
| <i>rps14</i>         | 194                                                 | rps14-194 = CCTTTGCACGAGTCAGAAACCGATG                                                                                                                                   |
| <i>rps4</i>          | 967                                                 | rps4-967 = GGATCGAACTACCTACTCATTATTTGGAGG                                                                                                                               |
| UTR and introns      |                                                     |                                                                                                                                                                         |
| <i>nad5</i> -intron  | 803                                                 | nad5-int-803R = CTCGTAATTCACTTTTGACTCTGTGTTCCG                                                                                                                          |
| <i>nad7</i> -leader  | -39                                                 | nad7-ld-39 = TTTCTGGTACAAGTGGTATTGGACAAGATC                                                                                                                             |
| <i>rpl5</i> -trailer | 195                                                 | rpl5-tr-195 = CCTTTGCACGAGTCAGAAACCGATG                                                                                                                                 |

<sup>a</sup>Site differentially edited in silenced vs. control plants was detected by bulk sequencing. Position of the edited C in the coding sequence is given relative to the start codon. In leader and trailer, the position of the edited C is relative to the start codon and stop codon respectively.

<sup>b</sup>ddCTP is used with gene-site, ddGTP is used with gene-siteR.

**Supplemental Table 4.** Primers used for semi quantitative RT-PCR

| Product                | Primers                                                                         | Amplicon length |
|------------------------|---------------------------------------------------------------------------------|-----------------|
| nad2-intron2 spliced   | nad2-ex2-F1 = AATATTTGATCTTAGGTGCATTTTC<br>nad2-ex3-R1 = AAAGGAACTGCAGTGATCTTGA | 205 bp          |
| nad2-intron2 adjoining | nad2-ex2-F1 = AATATTTGATCTTAGGTGCATTTTC<br>nad2-int2-R1 = CCCGATCCGATAGTTTACAA  | 145 bp          |
| nad2-intron3 spliced   | nad2-ex3-F1 = CTATGGGTCTACTGGAGCTACCC<br>nad2-ex4-R1 = GCGCAATAGAAAGGAATGCT     | 215 bp          |
| nad2-intron3 adjoining | nad2-int3-F1 = GGCGAATTTCAAACCTTGTGG<br>nad2-ex4-R1 = GCGCAATAGAAAGGAATGCT      | 156 bp          |
